# Supplementary material
Source: ML conference proceedings conference paper supplement (https://openreview.net/forum?id=EEVpt3dJQj)
Supplement: supplementary_material [file attachment]

## 495 A Auditing Multiple Groups

496 Here we consider the case when there are more than two groups. Suppose we have  $J + 1$  groups  
497  $\{0, 1, \dots, J\}$ . In accordance with Definition 1, the null and alternative become

$$H_0 : \mathbb{E}_\rho[\varphi(X)|\xi_i] = \mathbb{E}_\rho[\varphi(X)|\xi_j], \quad \forall i, j \in \{0, \dots, J\}, \quad (13)$$

$$H_1 : \exists i, j \in \{0, \dots, J\} \text{ such that } \mathbb{E}_\rho[\varphi(X)|\xi_i] \neq \mathbb{E}_\rho[\varphi(X)|\xi_j]. \quad (14)$$

498 As before, let  $\mu_i = \mathbb{E}_\rho[\varphi(X)|\xi_i]$ ,  $i \in \{0, \dots, J\}$ . One could derive a sequential test by applying  
499 Algorithm 1 to each pair of means  $\mu_i$  and  $\mu_j$ . Game-theoretically, this can be interpreted as splitting  
500 your initial wealth among multiple games and playing each simultaneously. If you grow rich enough  
501 in any one game, you reject the null. Of course, one needs to adjust the significance level to account  
502 for the number of games being played, thus reducing the (nonasymptotic) power of the test.

503 Of course, it is not necessary to test each mean against all others. We need only test whether  
504  $\mu_b = \mu_{b+1}$  for all  $b \in \{0, \dots, J\}$ . That is, we can play  $J$  games instead of  $\Omega(J^2)$  games. In order to  
505 ensure this constitutes a level- $\alpha$  test, we reject when the wealth process of any game is at least  $(\alpha J)^{-1}$ .  
506 The union bound then ensures that the type-I error of this procedure is bounded by  $\alpha$ . Moreover,  
507 the asymptotic power remains one since, if  $\mu_i \neq \mu_j$  for some  $i, j$  then  $\mu_b \neq \mu_{b+1}$  for some  $b$ . The  
508 guarantees we've provided on Algorithm 1 ensure that the wealth process for this particular game  
509 will eventually grow larger than  $(\alpha J)^{-1}$ , thus our test will reject. We summarize this discussion with  
510 the following proposition, which is the equivalent of Proposition 1 for auditing multiple groups.

511 **Proposition 4.** *Let  $\alpha \in (0, 1)$ . Consider running Algorithm 1 on groups  $b, b+1$ , for  $b \in \{0, 1, \dots, J\}$   
512 in parallel with input parameter  $\alpha/K$ . This constitutes a level- $\alpha$  sequential test for (13) with  
513 asymptotic power one against (14). If we receive an audit from each group at each timestep, then the  
514 expected stopping time  $\tau$  of this procedure obeys*

$$\mathbb{E}[\tau] \lesssim \min_{b \in \{0, \dots, J-1\}} \frac{1}{|\mu_b - \mu_{b+1}|^2} \log \left( \frac{J}{|\mu_b - \mu_{b+1}|^2 \alpha} \right). \quad (15)$$

515 The expected stopping time follows from Proposition 1 after correcting for the significance level and  
516 the difference between the means. We take the minimum over all  $b$  because the procedure rejects as  
517 soon as any of the wealth processes grow too large. Equivalent versions of Propositions 2 and 3 for  
518 multiple groups can be obtained similarly.

## 519 B Omitted Proofs

### 520 B.1 Proof of Proposition 1

521 We break the proof into three components.

522 **Level- $\alpha$  sequential test.** Combining the discussion at the beginning of Section 3 with Ville's  
523 inequality demonstrates why our procedure constitutes a level- $\alpha$  sequential test. However, let us prove  
524 it formally here for completeness. Let  $P \in H_0$  and note that  $\mathbb{E}_P[\hat{Y}_t^0 - \hat{Y}_t^1] = \mathbb{E}_P[\varphi(X_t^0) - \varphi(X_t^1)] =$   
525  $\mu_0 - \mu_1 = 0$ . Therefore, using the fact that  $\lambda_t$  is predictable (i.e.,  $\mathcal{F}_{t-1}$ -measurable)

$$\mathbb{E}_P[\mathcal{K}_t | \mathcal{F}_{t-1}] = \mathbb{E}_P \left[ \prod_{j=1}^t (1 + \lambda_j (\hat{Y}_j^0 - \hat{Y}_j^1)) \middle| \mathcal{F}_{t-1} \right] = \mathcal{K}_{t-1} (1 + \lambda_t \mathbb{E}_P[\hat{Y}_t^0 - \hat{Y}_t^1]) = \mathcal{K}_{t-1},$$

526 so  $(\mathcal{K}_t)_{t \geq 1}$  is a  $P$ -martingale, with initial value 1. Moreover, it is nonnegative since  $|\lambda_t| \leq 1/2$  for all  
527  $t$  by definition of ONS. Thus, Ville's inequality implies  $P(\exists t \geq 1 : \mathcal{K}_t \geq 1/\alpha) \leq \alpha$ , meaning that  
528 rejecting at  $1/\alpha$  yields a level- $\alpha$  sequential test. Finally, as discussed in the main paper, the last lines  
529 of Algorithm 1 are justified by the randomized Ville's inequality of Ramdas and Manole [43], which  
530 states that, for all stopping times  $n$ ,

$$P(\exists t \leq n : \mathcal{K}_t \geq 1/\alpha \text{ or } \mathcal{K}_n > U/\alpha) \leq \alpha,$$

531 where  $U \sim \text{Unif}(0, 1)$  is independent of everything else.

532 **Asymptotic power.** Next, let us demonstrate that Algorithm 1 has asymptotic power one. That is,  
 533 for  $P \in H_1$ ,  $P(\tau < \infty) = 1$ . It suffices to show that  $P(\tau = \infty) = 0$ . To see this, define

$$g_t := \hat{Y}_t^0 - \hat{Y}_t^1, \quad S_t := \sum_{i=1}^t g_i, \quad V_t := \sum_{i=1}^t g_i^2.$$

534 We have the following guarantee on the wealth process, which can be translated from results  
 535 concerning ONS from Cutkosky and Orabona [44, Theorem 1]:

$$\mathcal{K}_t \geq \frac{1}{V_t} \exp \left\{ \frac{S_t^2}{4(V_t + |S_t|)} \right\} \geq \frac{1}{t} \exp \left\{ \frac{S_t^2}{8t} \right\}, \quad \forall t \geq 1. \quad (16)$$

536 Since  $\{\tau = \infty\} \subset \{\tau \geq t\}$  for all  $t \geq 1$ , we have  $P(\tau = \infty) \leq \liminf_{t \rightarrow \infty} P(\tau > t) \leq$   
 537  $\liminf_{t \rightarrow \infty} P(\mathcal{K}_t < 1/\alpha)$ , where the final inequality is by definition of the algorithm. Using the  
 538 second inequality of (16),

$$P(\mathcal{K}_t < 1/\alpha) \leq P \left( \exp \left\{ \frac{S_t^2}{8t} \right\} < t/\alpha \right) \leq P \left( -\sqrt{\frac{8 \log(t/\alpha)}{t}} < \frac{S_t}{t} < \sqrt{\frac{8 \log(t/\alpha)}{t}} \right).$$

539 By the SLLN,  $S_t/t$  converges to  $\mu_0 - \mu_1 \neq 0$  almost surely. On the other hand,  $8 \log(t/\alpha)/t \rightarrow 0$ .  
 540 Thus, if we let  $A_t$  be the event that  $\exp(S_t^2/8t) < t/\alpha$ , we see that  $\mathbf{1}(A_t) \rightarrow 0$  almost surely. Hence,  
 541 by the dominated convergence theorem,

$$P(\tau = \infty) \leq \liminf_{t \rightarrow \infty} P(A_t) = \liminf_{t \rightarrow \infty} \int \mathbf{1}(A_t) dP = \int \liminf_{t \rightarrow \infty} \mathbf{1}(A_t) dP = 0.$$

542 This completes the argument.

543 **Expected stopping time.** Last, let us show the desired bound on the expected stopping time. Fix  
 544  $P \in H_1$ . Let  $\tau$  be the stopping time of the test. Since it is nonnegative, we have

$$\mathbb{E}[\tau] = \sum_{t=1}^{\infty} P(\tau > t) = \sum_{t=1}^{\infty} P(\log \mathcal{K}_t < \log(1/\alpha)) = \sum_{t=1}^{\infty} P(E_t),$$

545 for  $E_t = \{\log \mathcal{K}_t < \log(1/\alpha)\}$ . Note that the second equality is by definition of the algorithm.  
 546 Employing the first inequality of (16) yields

$$\begin{aligned} E_t &\subset \{S_t^2 < 4(V_t + |S_t|)(\log(1/\alpha) - \log(1/V_t))\} \\ &\subset \left\{ S_t^2 < 4 \left( V_t + \sum_{i \leq t} |g_i| \right) (\log(1/\alpha) - \log(1/V_t)) \right\}. \end{aligned}$$

547 To analyze the probability of this event, we first develop upper bounds on  $W_t := \sum_{i \leq t} |g_i|$  and  $V_t$ .  
 548 We begin with  $W_t$ . Since  $W_t$  is the sum of independent random variables in  $[0, 1]$ , we apply the  
 549 multiplicative Chernoff bound (e.g., [57]) to obtain

$$P(W_t > (1 + \delta)\mathbb{E}[W_t]) \leq \exp(-\delta^2 \mathbb{E}[W_t]/3).$$

550 Setting the right hand side equal to  $1/t^2$  and solving for  $\delta$  gives  $\delta = \sqrt{6 \log t / \mathbb{E}[W_t]}$ . Thus, with  
 551 probability  $1 - 1/t^2$ , we have

$$W_t \leq \mathbb{E}W_t + \sqrt{6\mathbb{E}[W_t] \log t} = t + \sqrt{6t \log t} \leq 2t \quad \forall t \geq 17, \quad (17)$$

552 where we've used that  $\mathbb{E}[W_t] = \sum_{i \leq t} \mathbb{E}[|g_i|] \leq t$  since  $|g_i| \leq 1$ . Following a nearly identical process  
 553 for  $V_t$ , we have that with probability  $1 - 1/t^2$ ,

$$V_t \leq \mathbb{E}[V_t] + \sqrt{6\mathbb{E}[V_t] \log t} \leq t + \sqrt{6t \log t} \leq 2t, \quad \forall t \geq 17, \quad (18)$$

554 where again we use that  $|g_i|^2 \leq |g_i| \leq 1$ . Let  $H_t = \{V_t \leq 2t\} \cap \{W_t \leq 2t\}$ . Then,

$$E_t \cap H_t \subset \{S_t^2 < 16t(\log(1/\alpha) + \log(2t))\} \subset \{|S_t| < \underbrace{4\sqrt{t \log(2t/\alpha)}}_{:=D}\}.$$

We now argue that  $|S_t|$  is unlikely to be so small. Indeed, since  $S_t$  is the sum of independent random variables in  $[-1, 1]$ , applying a Chernoff bound for the third time gives  $P(|S_t - \mathbb{E}S_t| \geq u) \leq 2 \exp(-u^2/t)$ . So, with probability  $1 - 1/t^2$ , by the reverse triangle inequality,

$$||S_t| - |\mathbb{E}S_t|| \leq |S_t - \mathbb{E}S_t| \leq \sqrt{t \log 2t^2},$$

implying that,

$$|S_t| \geq |\mathbb{E}S_t| - \sqrt{t \log 2t^2} \geq t\Delta - \sqrt{2t \log 2t}.$$

This final quantity is at least  $D$  for all  $t \geq \frac{81}{\Delta^2} \log(\frac{162}{\Delta^2 \alpha})$ . Now, combining what we've done thus far, by the law of total probability,

$$P(E_t) = P(E_t \cap H_t) + P(E_t | H_t^c) P(H_t^c) \leq P(|S_t| < D) + P(H_t^c) \leq 3/t^2,$$

and so, for  $t$  large enough such that (17), (18), and  $S_t > D$  all hold, that is

$$T = \frac{81}{\Delta^2} \log\left(\frac{162}{\Delta^2 \alpha}\right),$$

we have

$$\mathbb{E}[\tau] = \sum_{t \geq 1} P(E_t) \leq T + \sum_{t \geq T} \frac{3}{t^2} \leq T + \frac{\pi^2}{2}.$$

This completes the proof.

## B.2 Proof of Proposition 2

The proof is similar to that of Proposition 1, so we highlight only the differences.

The wealth process remains a martingale due to the IPW weights (7). Indeed, since  $\lambda_t$  and  $L_t$  are  $\mathcal{F}_{t-1}$  measurable, under the null we have

$$\begin{aligned} \mathbb{E}[\mathcal{K}_t | \mathcal{F}_{t-1}] &= \mathbb{E}\left[\prod_{j=1}^t (1 + \lambda_j L_j (\hat{Y}_j^0 \omega_j^0 - \hat{Y}_j^1 \omega_j^1)) \middle| \mathcal{F}_{t-1}\right] \\ &= \mathcal{K}_{t-1} (1 + \lambda_t L_t \mathbb{E}[\hat{Y}_t^0 \omega_t^0 - \hat{Y}_t^1 \omega_t^1]) = \mathcal{K}_{t-1} (1 + \lambda_t L_t (\mu_0 - \mu_1)) = \mathcal{K}_{t-1}. \end{aligned}$$

Moreover, as described in the text, multiplication by  $L_t$  ensures that  $\mathcal{K}_t$  is nonnegative, since

$$\begin{aligned} |L_t| |\hat{Y}_t^0 \omega_t^0(X_t^0) - \hat{Y}_t^1 \omega_t^1(X_t^1)| &\leq L_t |\hat{Y}_t^0 \omega_t^0(X_t^0)| + L_t |\hat{Y}_t^1 \omega_t^1(X_t^1)| \\ &\leq L_t \omega_t^0(X_t^0) + L_t \omega_t^1(X_t^1) \leq 1, \end{aligned}$$

since

$$L_t \leq \frac{1}{2\omega_t^b(X_t^b)},$$

for each  $b$  by definition. Therefore,  $(\mathcal{K}_t)_{t \geq 1}$  is a nonnegative martingale and, as before, Ville's inequality implies that rejecting at  $1/\alpha$  gives a level- $\alpha$  sequential test.

The asymptotic power follows by replacing  $g_t$  in Appendix B.1 with

$$h_t = L_t (\hat{Y}_t^0 \omega_t^0 - \hat{Y}_t^1 \omega_t^1).$$

Under the alternative,  $h_t$  has non-zero expected value, so identical arguments apply.

Regarding, the expected stopping time, we again argue about  $h_t$  instead of  $g_t$ . Since  $|h_t| \leq 1$  (see above), the bounds on  $V_t$  and  $W_t$  remain as they are in the proof of Proposition 1. The bound on  $|\mathbb{E}[S_t]|$  is where the proof departs that in Appendix B.1. In this case we have

$$\mathbb{E}[S_t | \mathcal{F}_{t-1}] = S_{t-1} + L_t \mathbb{E}[\hat{Y}_t^0 \omega_t^0 - \hat{Y}_t^1 \omega_t^1 | \mathcal{F}_{t-1}] = S_{t-1} + L_t (\mu_0 - \mu_1).$$

Therefore,

$$\mathbb{E}[S_t] = \mathbb{E}[\mathbb{E}[S_t | \mathcal{F}_{t-1}]] = \mathbb{E}[S_{t-1} + L_t (\mu_0 - \mu_1)] = \mathbb{E}[S_{t-1}] + (\mu_0 - \mu_1) \mathbb{E}[L_t].$$

Induction thus yields

$$|\mathbb{E}[S_t]| = \left| (\mu_0 - \mu_1) \sum_{i \leq t} \mathbb{E}[L_i] \right| = \Delta \left| \sum_{i \leq t} \mathbb{E}[L_i] \right| \geq \Delta t L_{\inf}.$$

From here, we may replace  $\Delta$  in the proof in Appendix B.1 with  $\Delta L_{\inf}$  and the arithmetic remains the same. This yields the desired result.

### 581 B.3 Proof of Proposition 3

582 Again, the proof mirrors that of Proposition 1 so we highlight only the differences.

583 First let us ensure that Algorithm 1 yields a level- $\alpha$  sequential test. As before, it suffices to demonstrate  
584 that the wealth process is a nonnegative martingale. The time-varying means do not change this fact  
585 from before:

$$\mathbb{E}[\mathcal{K}_t | \mathcal{F}_{t-1}] = \mathbb{E}\left[\prod_{j=1}^t (1 + \lambda_j(\hat{Y}_j^0 - \hat{Y}_j^1)) \middle| \mathcal{F}_{t-1}\right] = \mathcal{K}_{t-1}(1 + \lambda_t \mathbb{E}[\hat{Y}_t^0 - \hat{Y}_t^1 | \mathcal{F}_{t-1}]) = \mathcal{K}_{t-1},$$

586 since, under the null,  $\mathbb{E}[Y_t^0 | \mathcal{F}_{t-1}] = \mathbb{E}[\varphi(X) | \xi_0, \mathcal{F}_{t-1}] = \mu_0 = \mu_1 = \mathbb{E}[\varphi(X) | \xi_1, \mathcal{F}_{t-1}] =$   
587  $\mathbb{E}[Y_t^1 | \mathcal{F}_{t-1}]$ . Nonnegativity once again follows from the ONS strategy.

588 Asymptotic power follows an identical argument as in Appendix B.1, so we focus on expected  
589 stopping time. The event  $E_t$  remains the same as in Appendix B.1. We again apply a Chernoff bound  
590 to  $W_t$  (the values remain independent, even though they are not necessarily identically distributed),  
591 and obtain

$$W_t \leq \mathbb{E}W_t + \sqrt{6\mathbb{E}[W_t] \log t} = 2t,$$

592 for  $t \geq 17$  with probability  $1 - 1/t^2$ , since again,  $|g_i| \leq 1$  for each  $i$ . Similarly,  $\mathbb{E}V_t \leq 2t$  with  
593 probability  $1 - 1/t^2$  for  $t \geq 17$ . Let the shift begin at time  $n$ , and place  $\Delta = \inf_{t \geq n} |\mu_0(t) - \mu_1(t)|$ .  
594 Then  $|\mathbb{E}S_t| \geq (t - n)\Delta$ . As above, we want to find  $t$  such that

$$|S_t| \geq |\mathbb{E}S_t| - \sqrt{t \log 2t^2} \geq (t - n)\Delta - \sqrt{t \log 2t^2} \geq D.$$

595 Rearranging and simplifying this final inequality, we see that it suffices for  $t$  to satisfy

$$t - n \geq \frac{6}{\Delta} \sqrt{t \log(2t/\alpha)}. \quad (19)$$

596 We claim this holds for all

$$t \geq n + \max \left\{ n, \frac{108}{\Delta^2} \log \left( \frac{108 \cdot 4}{\Delta^2 \alpha} \right) \right\}.$$

597 To see this, suppose first that  $n \geq \beta$  where

$$\beta = \frac{108}{\Delta^2} \log \left( \frac{108 \cdot 4}{\Delta^2 \alpha} \right).$$

598 Then, at  $t = 2n$ , the right hand side of (19) is

$$\frac{6}{\Delta} \sqrt{2n \log(2n/\alpha)} \leq n,$$

599 where the final inequality holds for all  $n \geq \beta$ , which was assumed. Now suppose that  $n < \beta$ , so that  
600 (19) should hold for  $t \geq n + \beta$ . Since the left hand side of (19) grows faster than the right hand side,  
601 it suffices to show that it holds at  $t = n + \beta$ . To this end, write

$$\begin{aligned} \frac{6}{\Delta} \sqrt{t \log(2t/\alpha)} \Big|_{t=n+\beta} &\leq \frac{6}{\Delta} \sqrt{(n + \beta) \log(2n/\alpha + 2\beta/\alpha)} \\ &\leq \frac{6}{\Delta} \sqrt{2\beta \log(4\beta/\alpha)} \\ &= \frac{72}{\Delta^2} \sqrt{\log \left( \frac{108 \cdot 4}{\Delta^2 \alpha} \right) \log \left( \frac{108 \cdot 4}{\Delta^2 \alpha} \log \left( \frac{108 \cdot 4}{\Delta^2 \alpha} \right) \right)} \\ &= \frac{72}{\Delta^2} \sqrt{\log \left( \frac{108 \cdot 4}{\Delta^2 \alpha} \right) \log \left( \frac{108 \cdot 4}{\Delta^2 \alpha} \right) + \log \log \left( \frac{108 \cdot 4}{\Delta^2 \alpha} \right)} \\ &\leq \frac{108}{\Delta^2} \log \left( \frac{108 \cdot 4}{\Delta^2 \alpha} \right) = \beta, \end{aligned}$$

602 where the final inequality uses the (loose) bound  $\log \log(x) \leq \log^2(x)$ .

## C Simulation Details

Code to recreate all plots and run the simulations is attached. Here we provide more extensive details on each figure.

**Figure 1.** Given  $\Delta$ , we generate the two means  $\mu_0$  and  $\mu_1$  as  $\mu_0 = 0.5 + \Delta/2$  and  $\mu_1 = 0.5 - \Delta/2$ . We take  $\varphi(X)|_{\xi_b}$  to be  $\text{Ber}(\mu_b)$ . (Thus, this simulates a scenario for which we witness the classification decisions, not e.g., a risk score.) We set  $\alpha = 0.01$ , so we reject when the wealth process is at least 100. We receive a pair of observations each timestep. Each experiment was run 100 times to generate the plotted standard deviation around the mean of each wealth process.

**Figure 2.** As above, we take the distribution of model observations  $\varphi_t(X)|_{\xi_b}$  to be  $\text{Ber}(\mu_b(t))$ . For the left hand side of Figure 2 we take  $\mu_0(t) = \mu_1(t) = 0.3$  for  $t = 1, \dots, 99$ . At  $t = 100$ , we add a logistic curve to  $\mu_1$ . In particular, we let

$$\mu_1(t) = 0.3 + \frac{0.5}{1 + \exp((250 - t)/25)}, \quad t \geq 100.$$

We keep  $\mu_0$  at 0.3. For the right hand side of Figure 2, we let both  $\mu_1$  and  $\mu_0$  be noisy sine functions with different wavelengths. We take

$$\mu_0(t) = \frac{\sin(t/40)}{10} + 0.4 + \epsilon_t^0,$$

for all  $t$ , where  $\epsilon_t^0 \sim N(0, 0.01)$ . Meanwhile,

$$\mu_1(t) = \frac{\sin(t/20)}{10} + 0.4 + \frac{t}{1000} + \epsilon_t^1,$$

where, again,  $\epsilon_t^1 \sim N(0, 0.01)$ . The mean  $\mu_1(t)$  thus has a constant upward drift over time. As before, we assume we receive a pair of observations at each timestep and we take  $\alpha = 0.01$ . We generate the means one, but run the sequential test 100 times in order to plot the standard deviation around the mean.

**Figures 3 and 4.** For a given sequential test and a given value of  $\alpha$ , we run (i) the test under the null hypothesis, and (ii) the test under the alternative. Repeating 300 times and taking the average gives the FPR and average rejection time for this value of  $\alpha$ . This procedure is how the leftmost two columns of Figure 3 were constructed. The final column then simply plots the FPR versus the value of  $\alpha$ .

We used a random forest for both the credit default dataset and the US census data. For the credit default dataset, the model does not satisfy equality of opportunity [39] when  $Y$  indicates whether an individual has defaulted on their loan, and  $A$  indicates whether or not they have any university-level education. One can imagine loans being given or withheld on the basis of whether they are predicted to be returned; we might wish that this prediction does not hinge on educational attainment. For the census data, the model does not satisfy equality of opportunity when  $A$  indicates whether an individual has an optical issues, and  $Y$  indicates whether they are covered by public insurance. Admittedly, this example is somewhat less normative than the other. It is unclear whether we should expect perfect equality of opportunity in this context. However, we emphasize that our experiments are for illustrative purposes only. They are not meant as comments on the actual fairness or unfairness of these datasets. We interface with the census by means the folktabs package [51].

For the credit default dataset and random forest classifier, we have  $\Delta = |\mu_0 - \mu_1| = 0.034$ , and  $\Delta = 0.09$  for the census data. To construct the fair model (in order to test the null), we add  $\Delta$  to the model predictions of the group with the lower mean. Thus, the distributions of predictions are different but the means are identical.

Figure 4 follows similar experimental logic, but we begin with a fair model (i.e., group predictions with the same mean), and then switch to the unfair random forest classifier at time  $t = 400$ .
